# Supplementary material for: Enhanced photocurrent response speed in charge-density-wave phase of TiSe2-metal junctions
Source: Royal Society of Chemistry journal article supplement (doi:10.1039/d1nr01810h), 2021-01-01
Supplement: d1nr01810h1.pdf [file d1nr01810h1.pdf]

# **Enhanced Photocurrent Response Speed in Charge-Density-Wave Phase of TiSe<sub>2</sub>-Metal Junctions**

*Thayer S. Walmsley<sup>1</sup> and Ya-Qiong Xu<sup>\*,1,2</sup>*

<sup>1</sup>Department of Physics and Astronomy, Vanderbilt University, Nashville, TN 37235, USA

<sup>2</sup>Department of Electrical Engineering and Computer Science, Vanderbilt University, Nashville,  
TN 37235, USA

\*Correspondence to: [yaqiong.xu@vanderbilt.edu](mailto:yaqiong.xu@vanderbilt.edu)

## S1. Scanning Photocurrent Microscopy under 650nm Wavelength Excitation

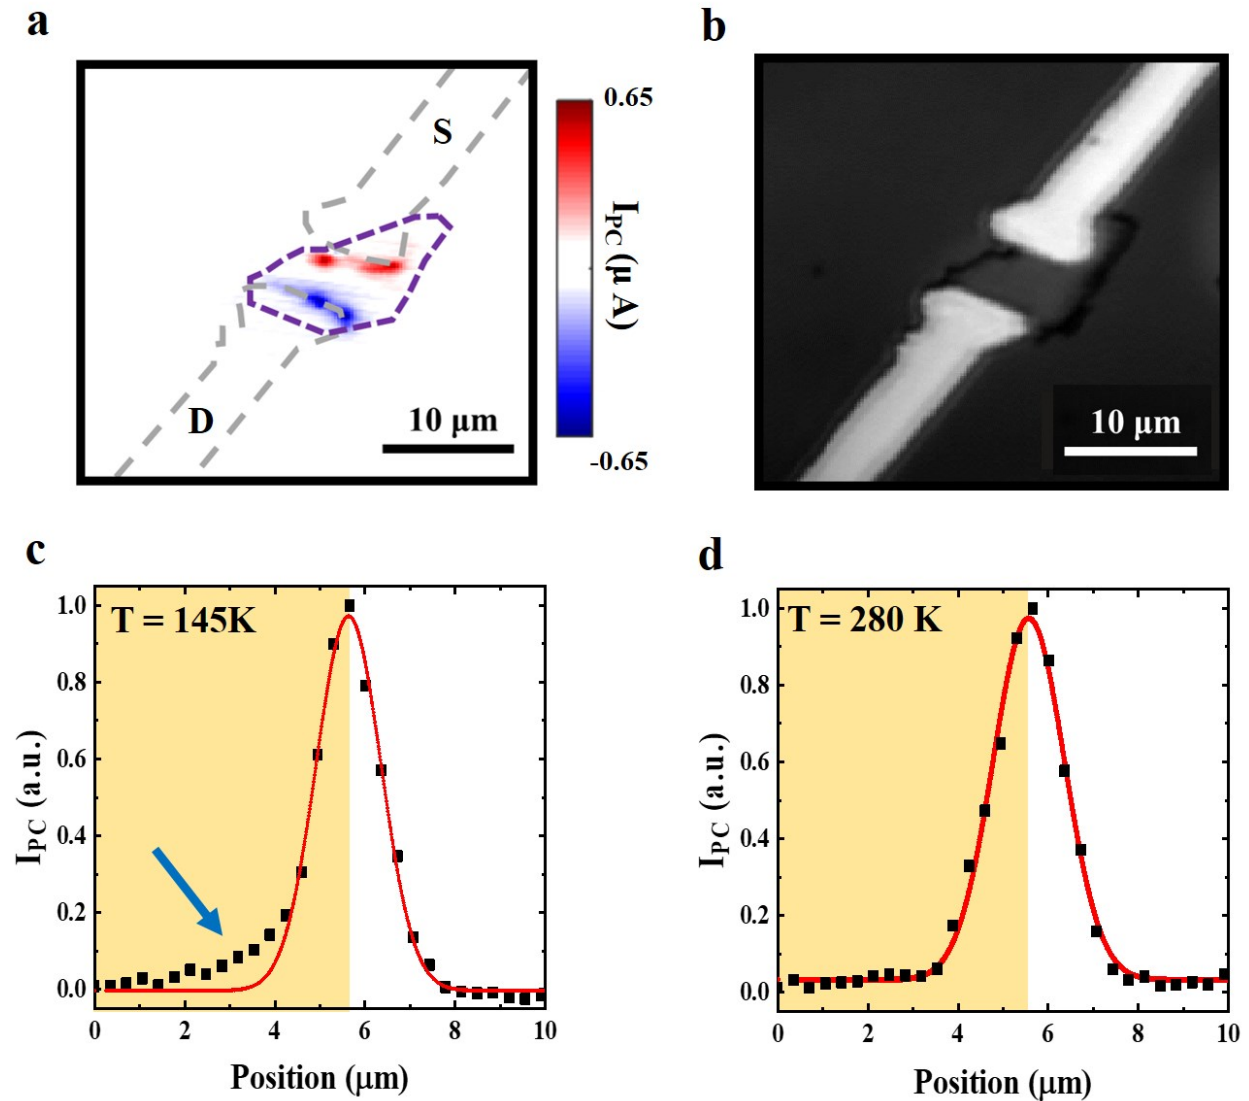

**Figure S1.** a) Spatially resolved scanning photocurrent and (b) reflection images of the device at 145 K show strong photocurrent responses at the  $TiSe_2$ -metal junctions. The power of the 650 nm laser is  $\sim 0.14$  mW. Photocurrent responses across the  $TiSe_2$ -metal junction at (c) 145 K and (d) 280 K, respectively. The black dots and red solid curves are experimental data and the related Gaussian fittings, respectively. The photocurrent "tail" on the electrode is highlighted by the blue arrow. The yellow backgrounds represent the positions of the electrodes.
